# Supplementary material
Source: Oxford University Press journal article supplement (https://cob.silverchair-cdn.com/cob/content_public/journal/dev/issue/89/supplement/7/advertising.pdf)
Supplement: Supplementary file 1 [file advertising.pdf]

# The Eukaryote Cell Nucleus

Announcing three important new books on structure biochemistry  
and molecular biology of the nucleus from

**The Company of Biologists Limited**

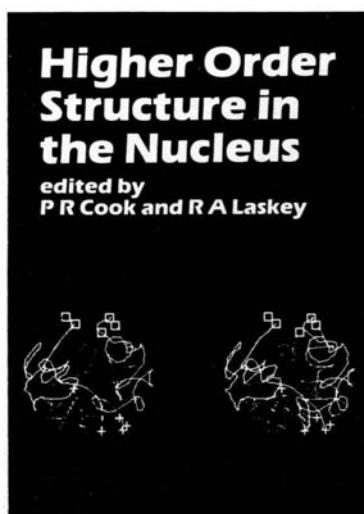

**Higher Order Structure in the Nucleus**

£10.00 plus £2.00 p&p \$19.00 plus \$4.00 p&p

236 pages casebound

ISBN 0 9508709 4 3

December 1984

**Programmes for Development**

£10.00 plus £2.00 p&p \$19.00 plus \$4.00 p&p

366 pages casebound

ISBN 0 9508709 2 7

November 1984

**Controlling Events in Meiosis**

£32.00 including p&p \$60.00 including p&p

394 pages casebound

ISBN 0 9508709 1 9

February 1985

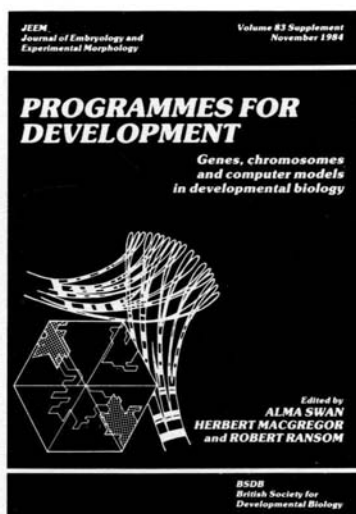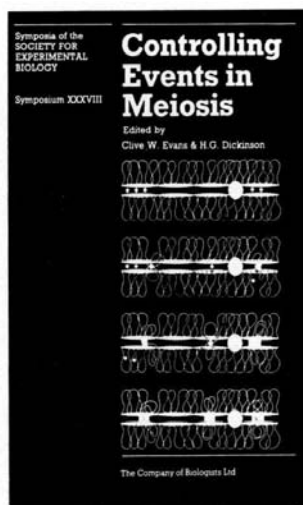

Order from or write for free brochure to  
The Biochemical Society Book Depot P.O. Box 32 Commerce Way Colchester  
Essex CO2 8HP UK
